# Supplementary material for: Elucidation of Focal Adhesion Kinase as a Modulator of Migration and Invasion and as a Potential Therapeutic Target in Chronic Lymphocytic Leukemia
Source: MDPI journal article supplement (doi:10.3390/cancers14071600), 2022-03-22
Supplement: s1 [file s1]

Article

# Elucidation of Focal Adhesion Kinase as a Modulator of Migration and Invasion and as a Potential Therapeutic Target in Chronic Lymphocytic Leukemia

Thomas A Burley <sup>1</sup>, Andrew Hesketh <sup>2</sup>, Giselda Bucca <sup>2</sup>, Emma Kennedy <sup>1</sup>, Eleni E. Ladikou <sup>1,3</sup>, Benjamin P. Towler <sup>1</sup>, Simon Mitchell <sup>1</sup>, Colin P. Smith <sup>2,4</sup>, Christopher Fegan <sup>5</sup>, Rosalynd Johnston <sup>3</sup>, Andrea Pepper <sup>1,\*†</sup> and Chris Pepper <sup>1,†</sup>

## Supplementary Figures

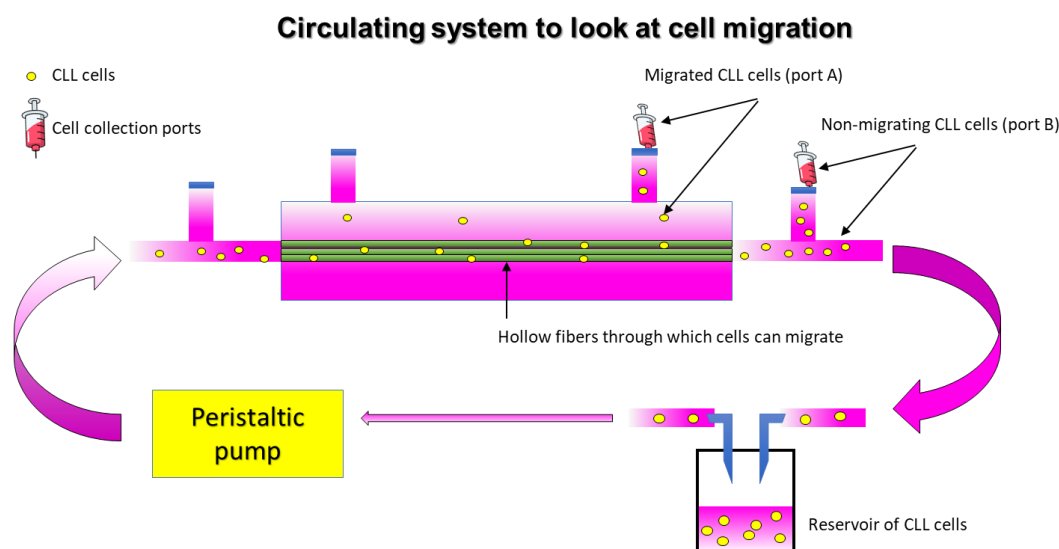

**Figure S1.** Schematic of the circulatory system.

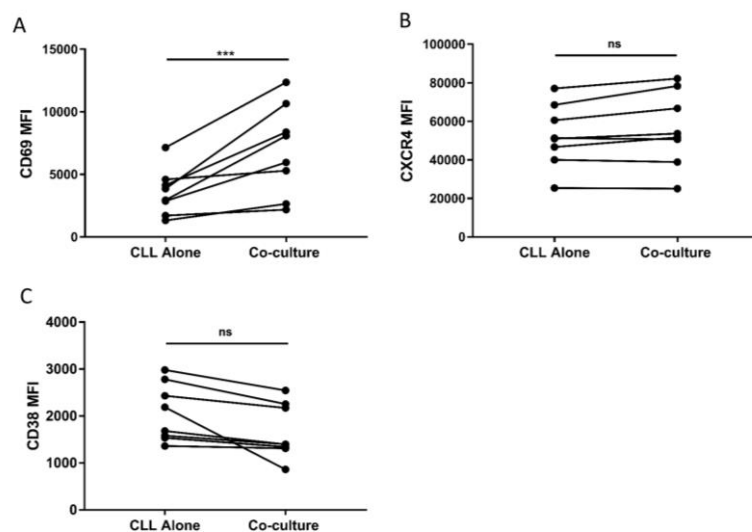

**Figure S2.** CD40L Fibroblast co-culture impact on CLL phenotypic markers after 4h. CLL phenotypic marker level MFIs, with or without CD40L fibroblast co-culture were quantified by flow cytometry on CD5+ CD19+ gated cells. CLL samples from the same patient are connected by a line. \*\*\*  $p \leq 0.001$ .

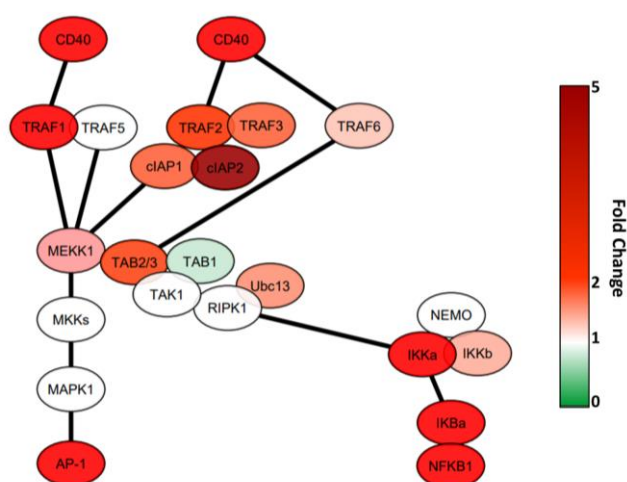

**Figure S3.** CD40L fibroblast co-culture upregulated CD40 signaling pathway proteins in CLL cells. RNA-seq differential expression overlaid on a CD40 signaling pathway cytoscape network.

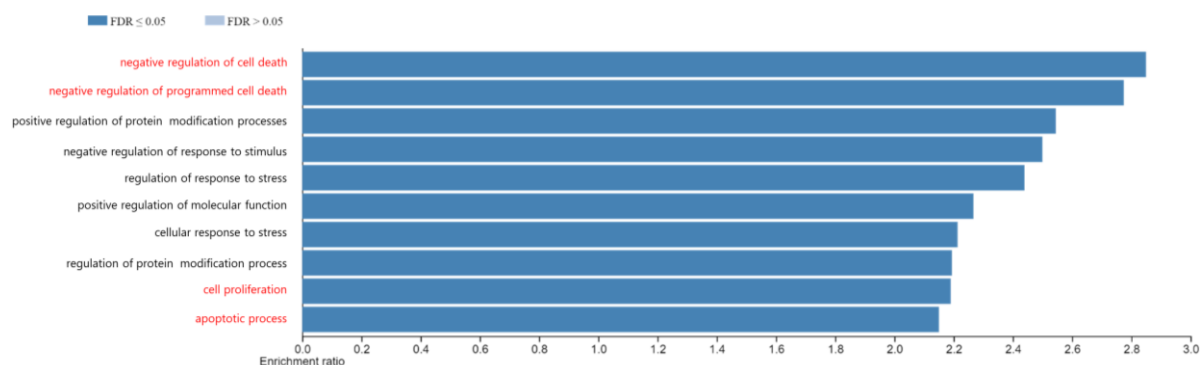

**Figure S4.** Common upregulated genes between the *in vitro* and co-culture system. The top 10 overrepresented pathways in the overlap between differentially expressed genes in the *in vitro* system migratory cells and the co-culture system in the KEGG pathway database.

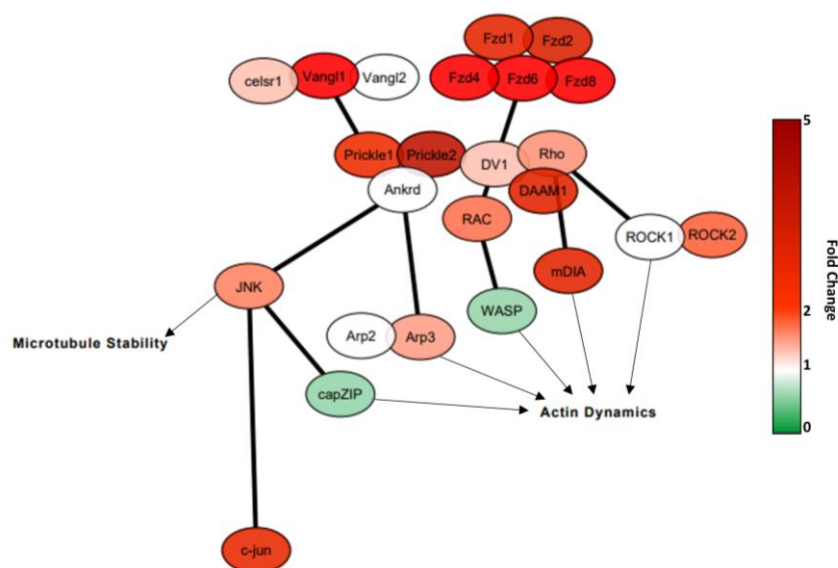

**Figure S5.** CLL migratory cells upregulated the WNT/PCP pathway. RNA-seq differential expression of migratory CLL cells overlaid on a WNT/PCP signaling pathway cytoscape network.

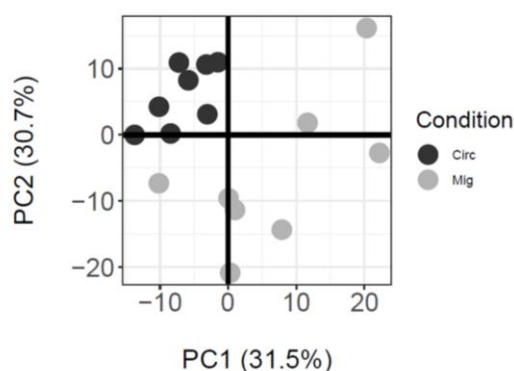

**Figure S6.** Principal component analysis (PCA) of CLL patient miRNA-seq data comparing circulatory and migratory CLL patient samples isolated from the *in vitro* system.

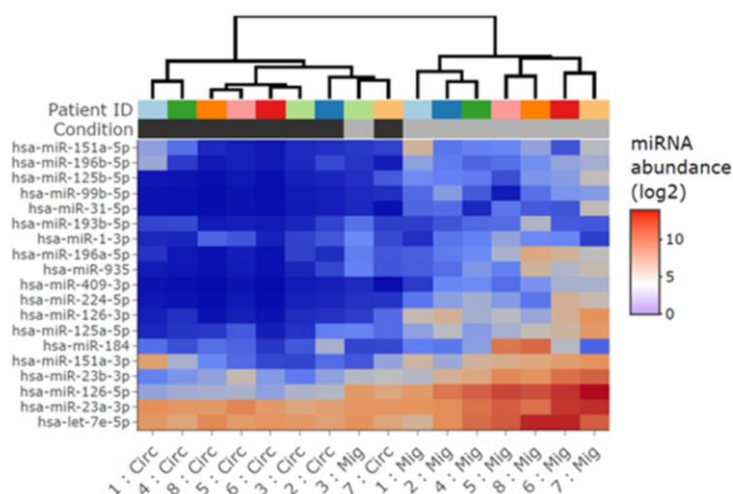

**Figure S7.** Hierarchical clustering of the circulatory vs migratory paired miRNA-seq samples for the 8 CLL *in vitro* system patients on the 19 differentially expressed miRNAs.

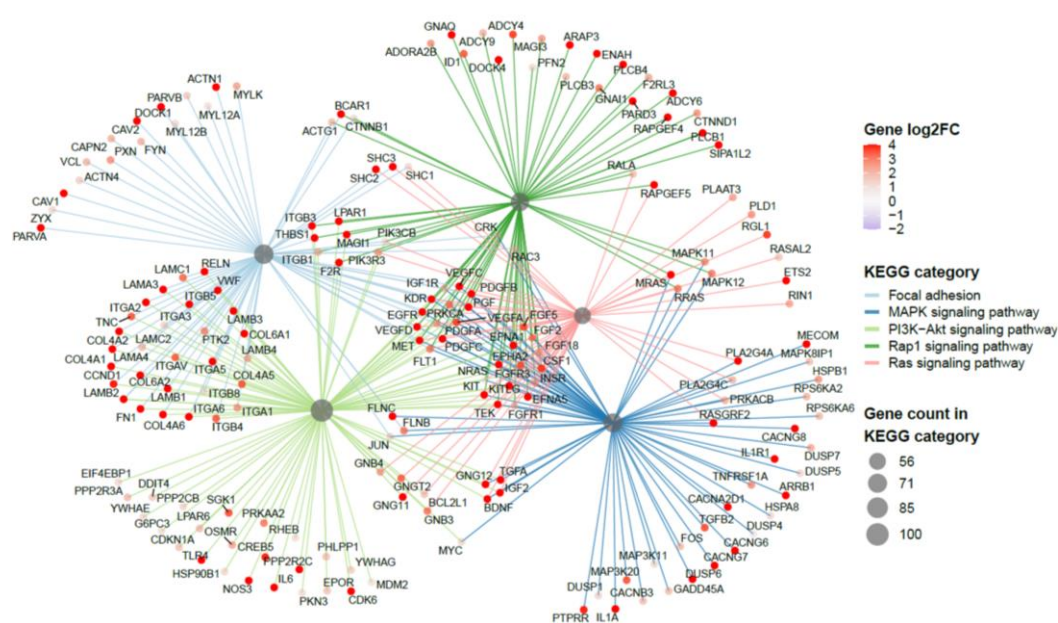

**Figure S8.** Pathway level analysis illustrating the up-regulated transcriptome KEGG pathways and upregulated GOA mRNA targets of the miRNAs.

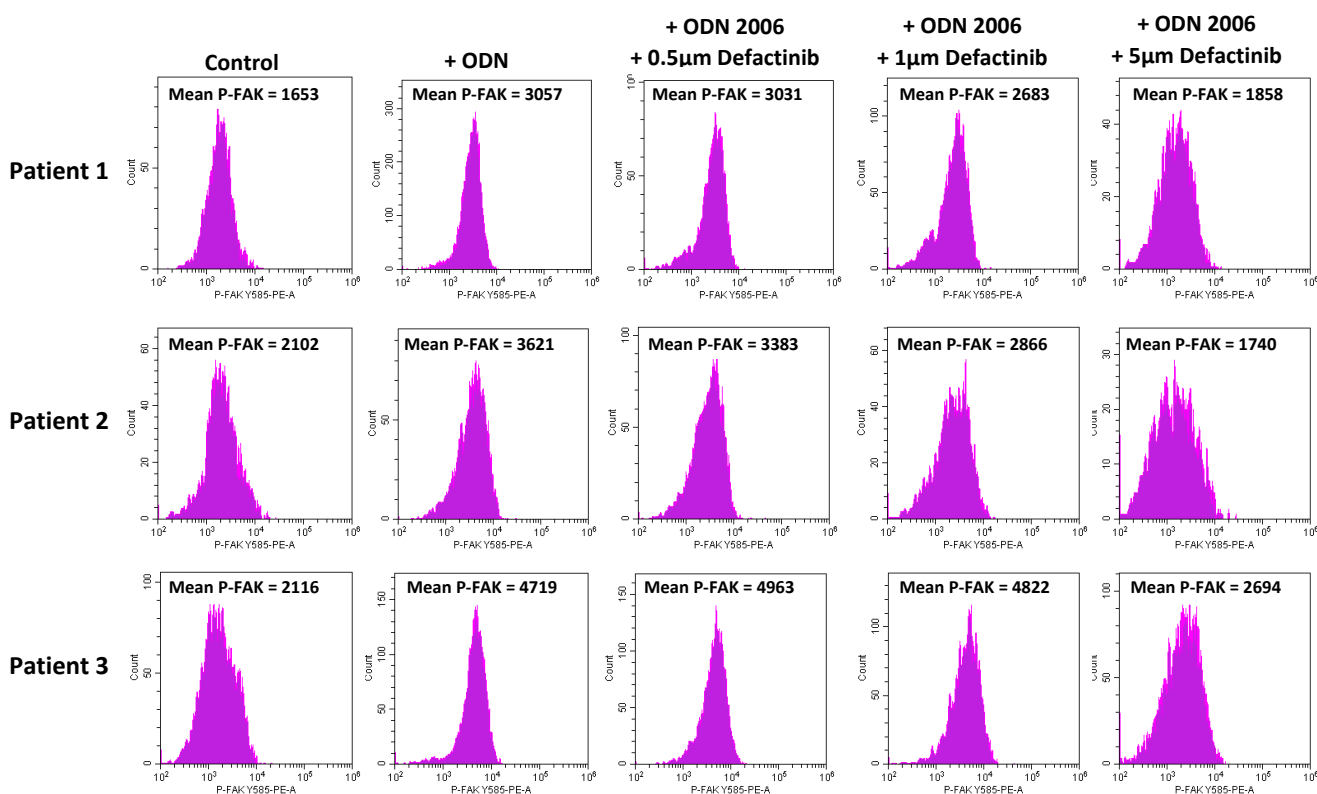

**Figure S9.** Stimulating CLL cells through TLR9 causes an increase in p-FAK. PBMCs from 3 different CLL patients were incubated with or without ODN2006 and for 24h in triplicate and the p-FAK levels assessed by flow cytometry. The mean fluorescence intensity was determined for both groups.

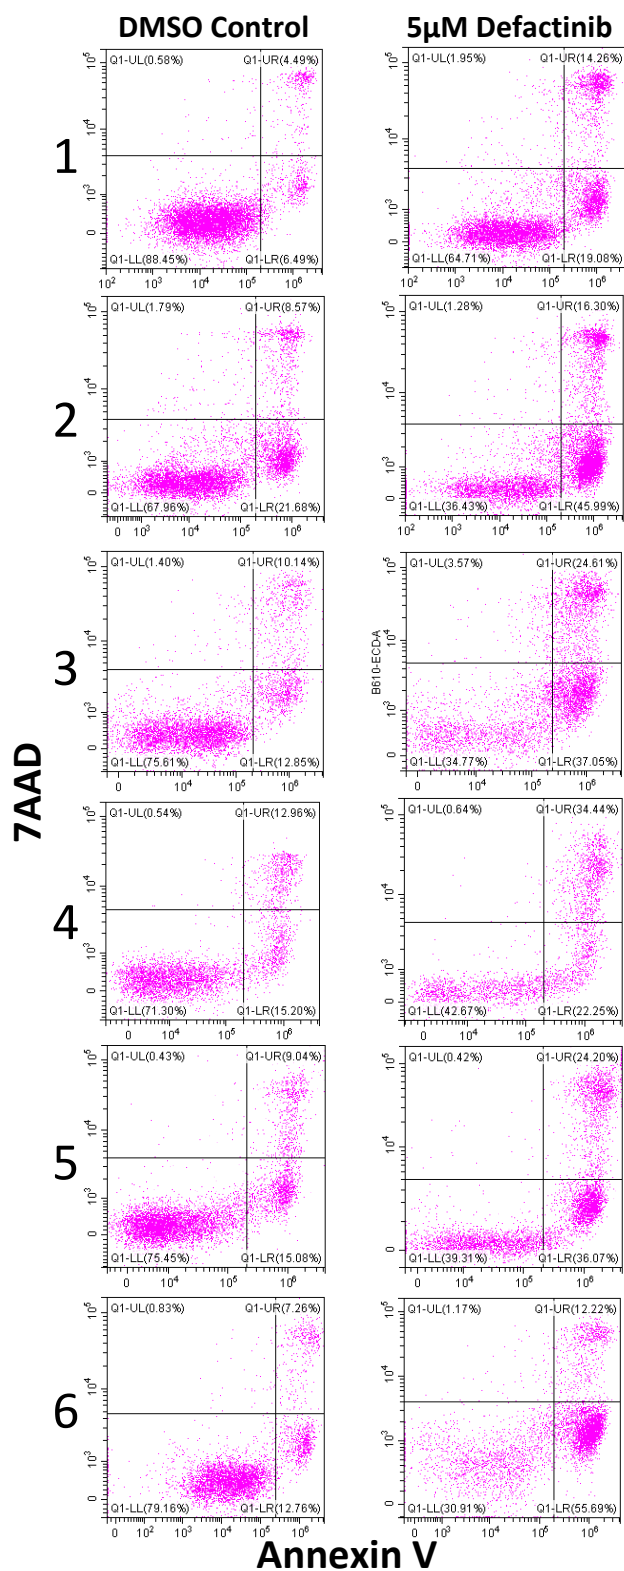

**Figure S10.** Defactinib treatment induces some cell death. PBMCs from 6 different CLL patients were incubated with ODN2006 and 5µM Defactinib for 24h and the levels of apoptosis was assessed by 7AAD/Annexin V staining.

| % Migration Inhibition<br>(vs DMSO Ctrl) | % Normalized Apoptosis<br>(vs DMSO Ctrl) |
|------------------------------------------|------------------------------------------|
| 80.7                                     | 44.2                                     |

**Figure S11.** Migration vs Cell viability. Mean % migration from the transwell experiments against cell viability for PBMCs from 6 different CLL patients after incubation with ODN2006 and 5 $\mu$ M Defactinib for 24h.

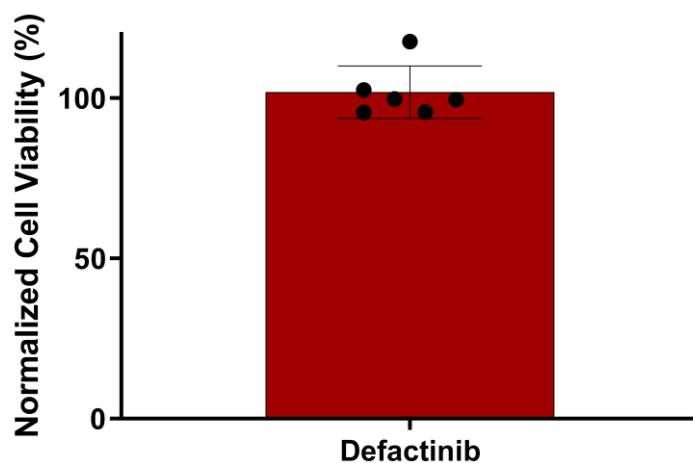

**Figure S12.** Invasion assay cell viability. PBMCs from 6 patients were pre-treated for 2h and 7AAD/Annexin V staining was performed to assess cell viability at the time of invasion assay initiation. Normalized to control cell viability.

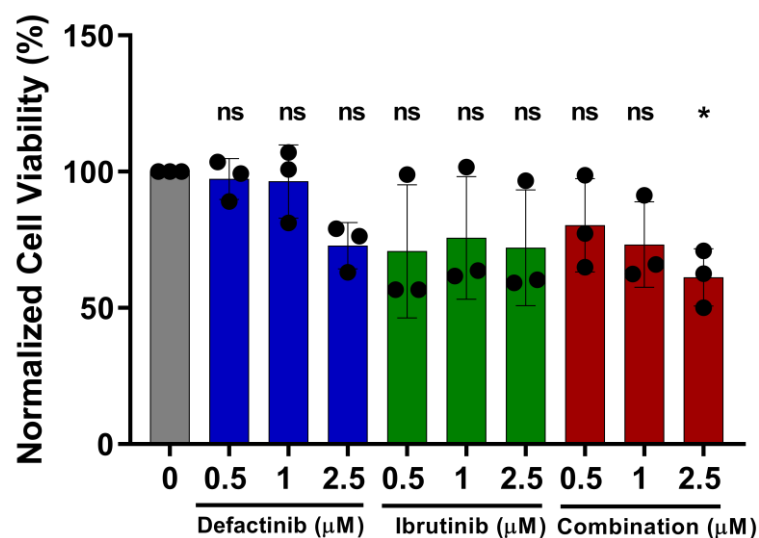

**Figure S13.** Cell viability following defactinib and ibrutinib treatment. PBMCs from 3 different CLL patients were incubated with defactinib, ibrutinib or a combination of both (molar ratio 1:1) for 24h before assessing the cell viability by 7AAD/ Annexin V staining.

## Supplementary Methods

### Sample Processing

Peripheral blood mononuclear cells (PBMCs) were isolated by Histopaque®-1077 (Sigma-Aldrich) density gradient centrifugation.

### In Vitro Circulatory System

The insides of the Polysulfone hollow fibres were coated with gelatin to allow the adhesion of endothelial cells ( $10 \times 10^6$  cells added) and allowed to attach for 3 hours at 37°C before initiating circulation of 40 mL M199 medium supplemented with 20% fetal bovine serum at low level of shear force overnight (1.5 dynes/cm<sup>2</sup>). The next day the shear force was increased in increments until a final shear force of 15.5 dynes/cm<sup>2</sup> was achieved. CLL cells were added to the reservoir in medium supplemented with recombinant human interleukin 4 (5 ng/mL) (R&D Systems) and circulated through the system for 24 h.

### RNA isolation and quantitative real-time PCR (qRT-PCR)

Total RNA was isolated using Qiazol and RNeasy kit (Qiagen) according to the manufacturer's instructions. RNA was reverse transcribed to cDNA using the High-Capacity cDNA Reverse Transcription Kit according to manufacturer's instructions (Applied Biosystems) and mixed with the TaqMan Fast Advanced Master Mix (Applied Biosystems). For the qPCR the ptk2 (Hs01056457\_m1) and 18S rRNA Endogenous Control Taqman gene expression assays (Applied Biosystems) were used. qPCR was performed in triplicate in three independent experiments using the AriaMx Real-time PCR System (Agilent) and the thermal profile: 50°C for 2 min, 95°C for 2 min, and then 40 cycles of 95°C for 1 s and 60°C for 20s. Expression data was normalized to the geometric mean of the house keeping gene and the fold change calculated using the Agilent Aria MX software.

## Supplementary Tables

**Table S1.** Antibodies used.

| Antibody   | Conjugate and Clone            | Supplier       |
|------------|--------------------------------|----------------|
| Anti-CD69  | Brilliant Violet 785 / FN50    | Biolegend      |
| Anti-CD62L | Brilliant Violet 650 / DREG-56 | Biolegend      |
| Anti-CXCR4 | PerCP/Cyanine5.5 / 12G5        | Biolegend      |
| Anti-CD38  | APC / HB-7                     | Biolegend      |
| Anti-p-FAK | PE / K73-480                   | BD Biosciences |

**Table S2. A–F.** Immunophenotypic characterization of the patient samples used in each experiment.

**A**

| RNA-Seq Circ vs Mig |         |           |         |           |        |          |             |
|---------------------|---------|-----------|---------|-----------|--------|----------|-------------|
| Sample ID           | CXCR4 % | CXCR4 MFI | CD49d % | CD49d MFI | CD38 % | CD38 MFI | IGHV Status |
| Patient 1           | 66.2    | 2577      | 97.4    | 16680     | 23.8   | 20.1     | Mutated     |
| Patient 2           | 99.3    | 23152     | 1.7     | 118.6     | 2.95   | 73.2     | Mutated     |
| Patient 3           | 94.7    | 22902     | 43.8    | 803       | 24.1   | 703      | Unmutated   |



|            |      |       |      |       |       |      |           |
|------------|------|-------|------|-------|-------|------|-----------|
| Patient 4  | 82.7 | 3170  | 98.7 | 10760 | 55.37 | 3333 | Mutated   |
| Patient 5  | 98.3 | 6259  | 89.7 | 6768  | 5.6   | 66.3 | Unmutated |
| Patient 6  | 98.3 | 25927 | 3.15 | 92    | 2.07  | 129  | Mutated   |
| Patient 7  | 99.7 | 27064 | 37.7 | 435   | 67.1  | 2002 | -         |
| Patient 8  | 98.3 | 36711 | 95.3 | 7132  | 90.8  | 4696 | -         |
| Patient 9  | 99.8 | 11733 | 3.4  | 31.2  | 0.6   | 53.6 | Mutated   |
| Patient 10 | 99.8 | 11693 | 3.4  | 32.9  | 0.6   | 53.6 | Unmutated |

## B

## miRNA-Seq Circ vs Mig

| Sample ID | CXCR4 % | CXCR4 MFI | CD49d % | CD49d MFI | CD38 % | CD38 MFI | IGVH Status |
|-----------|---------|-----------|---------|-----------|--------|----------|-------------|
| Patient 1 | 66.2    | 2577      | 97.4    | 16680     | 23.8   | 20.1     | Mutated     |
| Patient 2 | 99.3    | 23152     | 1.7     | 118.6     | 2.95   | 73.2     | Mutated     |
| Patient 3 | 94.7    | 22902     | 43.8    | 803       | 24.1   | 703      | Unmutated   |
| Patient 4 | 82.7    | 3170      | 98.7    | 10760     | 55.37  | 3333     | Mutated     |
| Patient 5 | 98.3    | 6259      | 89.7    | 6768      | 5.6    | 66.3     | Unmutated   |
| Patient 6 | 98.3    | 25927     | 3.15    | 92        | 2.07   | 129      | Mutated     |
| Patient 7 | 96.2    | 26046     | 9       | 0         | 1.3    | 164      | Mutated     |
| Patient 8 | 99.7    | 27064     | 37.7    | 435       | 67.1   | 2002     | -           |

## C

## RNA-Seq Coculture

| Sample ID | CXCR4 % | CXCR4 MFI | CD49d % | CD49d MFI | CD38 % | CD38 MFI | IGVH Status |
|-----------|---------|-----------|---------|-----------|--------|----------|-------------|
| Patient 1 | 99.6    | 33640     | 99.8    | 8634      | 52.5   | 1084     | Mutated     |
| Patient 2 | 98.4    | 27694     | 6.3     | 91.9      | 21     | 620      | -           |
| Patient 3 | 82.1    | 4769      | 28.7    | 386       | 70.9   | 1754     | Mutated     |
| Patient 4 | 95.2    | 9845      | 82.2    | 3020      | 42.15  | 589      | Unmutated   |
| Patient 5 | 82.7    | 3170      | 98.7    | 10760     | 55.37  | 3333     | Mutated     |
| Patient 6 | 76.5    | 2935      | 0.13    | 55.8      | 17.8   | 557      | Mutated     |
| Patient 7 | 98.4    | 3316.5    | 10.2    | 0         | 8.7    | 118.7    | -           |
| Patient 8 | 99.2    | 22352     | 2.2     | 39.1      | 23.4   | 498      | Mutated     |

## D

## TLR9 Migration

| Sample ID | CXCR4 % | CXCR4 MFI | CD49d % | CD49d MFI | CD38 % | CD38 MFI | TLR9 % | TLR9 MFI | IGVH Status |
|-----------|---------|-----------|---------|-----------|--------|----------|--------|----------|-------------|
| Patient 1 | 98.1    | 5072      | 61      | 1193      | 83.9   | 2646     | 91.0   | 3059     | Unmutated   |
| Patient 2 | 83.2    | 7727      | 8.9     | 305       | 86.8   | 5110     | 74.4   | 1875     | Unmutated   |
| Patient 3 | 98.4    | 3317      | 10.2    | 0         | 8.7    | 119      | 92.3   | 3355     | -           |
| Patient 4 | 99.8    | 11474     | 1.7     | 0         | 0.62   | 0        | 85.1   | 1700     | Mutated     |
| Patient 5 | 99.9    | 6612      | 100     | 19151     | 98.8   | 1088     | 84.3   | 1796     | Mutated     |
| Patient 6 | 64.1    | 2291      | 97.3    | 16635     | 19.38  | 0        | 89.2   | 2064     | Mutated     |

## E

## Synergy Experiment

| Sample ID | CXCR4 % | CXCR4 MFI | CD49d % | CD49d MFI | CD38 % | CD38 MFI | IGVH Status |
|-----------|---------|-----------|---------|-----------|--------|----------|-------------|
| Patient 1 | 99      | 6606      | 52.7    | 1580      | 22.2   | 359      | Unmutated   |
| Patient 2 | 93.8    | 3175      | 35.5    | 179       | 54.5   | 1226     | Mutated     |

|           |      |      |      |      |      |     |           |
|-----------|------|------|------|------|------|-----|-----------|
| Patient 3 | 89.2 | 4206 | 84.8 | 3917 | 26.2 | 296 | Unmutated |
|-----------|------|------|------|------|------|-----|-----------|

# F

| Invasion Assay |         |           |         |           |        |          |             |
|----------------|---------|-----------|---------|-----------|--------|----------|-------------|
| Sample ID      | CXCR4 % | CXCR4 MFI | CD49d % | CD49d MFI | CD38 % | CD38 MFI | IGVH Status |
| Patient 1      | 99.3    | 11916     | 81.7    | 4232      | 6.1    | 934      | -           |
| Patient 2      | 99.9    | 7657      | 0       | 0         | 47.0   | 809      | Mutated     |
| Patient 3      | 91.8    | 4320      | 84.6    | 4271      | 70.4   | 1944     | -           |
| Patient 4      | 64.1    | 2290      | 97.3    | 16635     | 19.4   | 0        | Mutated     |
| Patient 5      | 96.2    | 26046     | 9       | 0         | 1.3    | 164      | Mutated     |
| Patient 6      | 76.5    | 2935      | 0.13    | 55.8      | 17.8   | 557      | Mutated     |
